# Supplementary material
Source: ML conference proceedings conference paper supplement (https://proceedings.neurips.cc/paper_files/paper/2020/hash/3db54f5573cd617a0112d35dd1e6b1ef-Abstract.html)
Supplement: Supplementary file 1 [file 3db54f5573cd617a0112d35dd1e6b1ef-Supplemental.pdf]

# Appendix

## A Proofs for Section 2

### Proof of Lemma 2.1

*Proof.* We construct a "ghost" point:

$$x_1 = \mathcal{P}_{\mathcal{X}} \left( x - \frac{1}{\beta} \nabla_x \tilde{f}([x]_\beta, [y]_\beta) \right), \quad y_1 = \mathcal{P}_{\mathcal{Y}} \left( y + \frac{1}{\beta} \nabla_y \tilde{f}([x]_\beta, [y]_\beta) \right).$$

From  $(x, y)$  to  $(x_1, y_1)$  is just one step of extra-gradient with stepsize  $\frac{1}{\beta_0}$ . According to [34] or Section 4.5 of [4], we have

$$\begin{aligned} & \nabla_x \tilde{f}([x]_\beta, [y]_\beta)^T ([x]_\beta - \bar{x}) - \nabla_y \tilde{f}([x]_\beta, [y]_\beta)^T ([y]_\beta - \bar{y}) \\ & \leq \frac{\beta}{2} [\|x - \bar{x}\|^2 + \|y - \bar{y}\|^2] - (\|x_1 - \bar{x}\|^2 + \|y_1 - \bar{y}\|^2), \quad \forall \bar{x} \in \mathcal{X}, \bar{y} \in \mathcal{Y}. \end{aligned} \quad (10)$$

**I.** Denote  $x^*(y) = \arg \min_{x \in \mathcal{X}} \tilde{f}(x, y)$  and  $y^*(x) = \arg \max_{y \in \mathcal{Y}} \tilde{f}(x, y)$ . By convexity-concavity of  $\tilde{f}$ , we have

$$\begin{aligned} \text{gap}_{\tilde{f}}([z]_\beta) &= \tilde{f}([x]_\beta, [y]_\beta) - \min_{x \in \mathcal{X}} \tilde{f}(x, [y]_\beta) + \max_{y \in \mathcal{Y}} \tilde{f}([x]_\beta, y) - \tilde{f}([x]_\beta, [y]_\beta) \\ &\leq \nabla_x \tilde{f}([x]_\beta, [y]_\beta)^T ([x]_\beta - x^*([y]_\beta)) - \nabla_y \tilde{f}([x]_\beta, y_{k+1/2})^T ([y]_\beta - y^*([x]_\beta)) \\ &\leq \frac{\beta}{2} [\|x - x^*([y]_\beta)\|^2 + \|y - y^*([x]_\beta)\|^2] - (\|x_1 - x^*([y]_\beta)\|^2 + \|y_1 - y^*([x]_\beta)\|^2) \\ &\leq \beta [\|x - x^*\|^2 + \|x^* - x^*([y]_\beta)\|^2 + \|y - y^*\|^2 + \|y^* - y^*([x]_\beta)\|^2] \\ &\leq \beta [\|x - x^*\|^2 + \|y - y^*\|^2] + \frac{\beta \tilde{\ell}^2}{\tilde{\mu}^2} [\|x - x^*\|^2 + \|y - y^*\|^2] \\ &\leq \left( \beta + \frac{2\beta \tilde{\ell}^2}{\tilde{\mu}^2} \right) [\|x - x^*\|^2 + \|y - y^*\|^2] + \frac{2\beta \tilde{\ell}^2}{\tilde{\mu}^2} [\|x - x^*\|^2 + \|y - y^*\|^2], \end{aligned} \quad (11)$$

where in the second inequality we apply (10), in the third and last inequalities we use Young's inequality, and in the fourth inequality we use  $\|x^* - x^*([y]_\beta)\| = \|x^*(y^*) - x^*([y]_\beta)\| \leq \frac{\tilde{\ell}}{\tilde{\mu}} \|y - y^*\|$  (and similarly for  $\|y^* - y^*([x]_\beta)\|$ , see Lemma B.2 in [25]). From Lemma 3.1 and Proposition 3.2 in [48], we have

$$\|x - x_1\|^2 + \|y - y_1\|^2 \leq \frac{1}{(1 - \tilde{\ell}/\beta)^2} [\|x - x_1\|^2 + \|y - y_1\|^2] \leq \frac{2}{(1 - \tilde{\ell}/\beta)^3} [\|x - x^*\|^2 + \|y - y^*\|^2]. \quad (13)$$

Combining with (12), we have

$$\text{gap}_{\tilde{f}}([z]_\beta) \leq \left( \beta + \frac{2\beta \tilde{\ell}^2}{\tilde{\mu}^2} + \frac{4\beta \tilde{\ell}^2}{\tilde{\mu}^2 (1 - \tilde{\ell}/\beta)^3} \right) [\|x - x^*\|^2 + \|y - y^*\|^2]. \quad (14)$$

Then again from (10), for any arbitrary  $\bar{y} \in \mathcal{Y}$  we have

$$\begin{aligned} & \nabla_x \tilde{f}([x]_\beta, [y]_\beta)^T ([x]_\beta - x^*([y]_\beta)) - \nabla_y \tilde{f}([x]_\beta, [y]_\beta)^T ([y]_\beta - \bar{y}) \\ & \leq \frac{\beta}{2} [\|x - x^*([y]_\beta)\|^2 + \|y - \bar{y}\|^2] - (\|x_1 - x^*([y]_\beta)\|^2 + \|y_1 - \bar{y}\|^2) \\ & \leq \frac{\beta}{2} \|x - x^*([y]_\beta)\|^2 + \frac{\beta}{2} [\|y - \bar{y}\|^2 - \|y_1 - \bar{y}\|^2] \\ & \leq \frac{\beta}{2} \|x - x^*([y]_\beta)\|^2 + \frac{\beta}{2} \|y - y_1\| \|y - \bar{y} + y_1 - \bar{y}\| \\ & \leq \left( \beta + \frac{2\beta \tilde{\ell}^2}{\tilde{\mu}^2} + \frac{4\beta \tilde{\ell}^2}{\tilde{\mu}^2 (1 - \tilde{\ell}/\beta)^3} \right) [\|x - x^*\|^2 + \|y - y^*\|^2] + \beta \mathcal{D}_{\mathcal{Y}} [\|y - y^*\| + \|y_1 - y^*\|] \\ & \leq \left( \beta + \frac{2\beta \tilde{\ell}^2}{\tilde{\mu}^2} + \frac{4\beta \tilde{\ell}^2}{\tilde{\mu}^2 (1 - \tilde{\ell}/\beta)^3} \right) [\|x - x^*\|^2 + \|y - y^*\|^2] + 2\beta \mathcal{D}_{\mathcal{Y}} [\|x - x^*\| + \|y - y^*\|], \end{aligned} \quad (15)$$

where in the fourth inequality, we bound  $\|x - x^*([y]_\beta)\|^2$  the same way as we did from (11) to (13), and in the last inequality we use  $\|z - z^*\| \leq \|z_1 - z^*\|$  (Proposition 3.2 in [48]). By noting that

$$\nabla_x \tilde{f}([x]_\beta, [y]_\beta)^T ([x]_\beta - x^*([y]_\beta)) \geq 0,$$

we reach our conclusion.

2. Theorem 3.1 of [41] shows the relationship between  $\|x - x^*\| + \|y - y^*\|$  and  $\|x - [x]_\beta\| + \|y - [y]_\beta\|$  in the case  $\beta = 1$ . The proof can be extended to the following general case:

$$\|x - x^*\| + \|y - y^*\| \leq \frac{\beta + \tilde{\ell}}{\tilde{\mu}} [\|x - [x]_\beta\| + \|y - [y]_\beta\|].$$

The last relationship we want to show is just equation (13).  $\square$

## B Proofs for Section 3

### Proof of Theorem 3.1

*Proof.* Because  $\Phi_{x_t}(y) := \tilde{f}_t(x_t, y) = f(x_t, y) - \frac{\tau}{2}\|y - z_t\|^2$  is  $\tau$ -strongly-concave, we have

$$\Phi_{x_t}(y_t) - \Phi_{x_t}(y) \geq \frac{1}{2}\tau\|y - y_t\|^2 + \nabla_y \tilde{f}(x_t, y_t)^T (y_t - y), \quad \forall y \in \mathcal{Y}.$$

With stopping criterion of the subproblem (3), we have

$$f(x_t, y_t) - f(x_t, y) \geq \frac{1}{2}\tau\|y - y_t\|^2 + \frac{\tau}{2}\|y_t - z_t\|^2 - \frac{\tau}{2}\|y - z_t\|^2 - \epsilon^{(t)}. \quad (16)$$

Choose  $y = \alpha_t \tilde{y} + (1 - \alpha_t)y_{t-1}$  in (16), where  $\tilde{y}$  is an arbitrary vector in  $\mathcal{Y}$ , then

$$f(x_t, \tilde{y}) - f(x_t, y_t) \leq (1 - \alpha_t)[f(x_t, \tilde{y}) - f(x_t, y_{t-1})] - \frac{\tau}{2}\alpha_t^2(\|v_t - \tilde{y}\|^2 - \|v_{t-1} - \tilde{y}\|^2) - \frac{\tau}{2}\|y_t - z_t\|^2 + \epsilon^{(t)}. \quad (17)$$

Note that

$$\begin{aligned} f(x_t, \tilde{y}) - f(x_t, y_{t-1}) &= f(x_{t-1}, \tilde{y}) - f(x_{t-1}, y_{t-1}) + f(x_{t-1}, y_{t-1}) - f(x_t, y_{t-1}) + f(x_t, \tilde{y}) - f(x_{t-1}, \tilde{y}) \\ &\leq f(x_{t-1}, \tilde{y}) - f(x_{t-1}, y_{t-1}) + f(x_t, \tilde{y}) - f(x_{t-1}, \tilde{y}) + \epsilon^{(t-1)}, \end{aligned} \quad (18)$$

where the inequality follows because  $f(x_t, y_t) - \min_{x \in \mathcal{X}} f(x, y_t) \leq \epsilon^{(t)}$ . Plugging this back to (17) and rearranging,

$$\begin{aligned} \frac{1}{\alpha_t^2}[f(x_t, \tilde{y}) - f(x_t, y_t)] + \frac{\tau}{2}\|v_t - \tilde{y}\|^2 &\leq \frac{1 - \alpha_t}{\alpha_t^2}[f(x_{t-1}, \tilde{y}) - f(x_{t-1}, y_{t-1})] + \frac{\tau}{2}\|v_{t-1} - \tilde{y}\|^2 + \\ &\quad \frac{1 - \alpha_t}{\alpha_t^2}[f(x_t, \tilde{y}) - f(x_{t-1}, \tilde{y})] + \frac{1 - \alpha_t}{\alpha_t^2}\epsilon^{(t-1)} + \frac{1}{\alpha_t^2}\epsilon^{(t)}. \end{aligned} \quad (19)$$

Using the update rule for sequence  $\{\alpha_t\}_t$ , for  $t > 1$  we have

$$\begin{aligned} \frac{1}{\alpha_t^2}[f(x_t, \tilde{y}) - f(x_t, y_t)] + \frac{\tau}{2}\|v_t - \tilde{y}\|^2 &\leq \frac{1}{\alpha_{t-1}^2}[f(x_{t-1}, \tilde{y}) - f(x_{t-1}, y_{t-1})] + \frac{\tau}{2}\|v_{t-1} - \tilde{y}\|^2 + \\ &\quad \frac{1}{\alpha_{t-1}^2}[f(x_t, \tilde{y}) - f(x_{t-1}, \tilde{y})] + \frac{1}{\alpha_{t-1}^2}\epsilon^{(t-1)} + \frac{1}{\alpha_t^2}\epsilon^{(t)}. \end{aligned} \quad (20)$$

Iterating this inequality results in

$$\begin{aligned} \frac{1}{\alpha_t^2}[f(x_t, \tilde{y}) - f(x_t, y_t)] + \frac{\tau}{2}\|v_t - \tilde{y}\|^2 &\leq \frac{1}{\alpha_1^2}[f(x_1, \tilde{y}) - f(x_1, y_1)] + \frac{\tau}{2}\|v_1 - \tilde{y}\|^2 + \\ &\quad \sum_{t=2}^T \frac{1}{\alpha_{t-1}^2}[f(x_t, \tilde{y}) - f(x_{t-1}, \tilde{y})] + \sum_{t=2}^T \frac{1}{\alpha_{t-1}^2}\epsilon^{(t-1)} + \sum_{t=2}^T \frac{1}{\alpha_t^2}\epsilon^{(t)} \\ &= f(x_1, \tilde{y}) - f(x_1, y_1) + \frac{\tau}{2}\|v_1 - \tilde{y}\|^2 + \\ &\quad \sum_{t=2}^T \frac{1}{\alpha_{t-1}^2}[f(x_t, \tilde{y}) - f(x_{t-1}, \tilde{y})] + \sum_{t=2}^T \frac{1}{\alpha_{t-1}^2}\epsilon^{(t-1)} + \sum_{t=2}^T \frac{1}{\alpha_t^2}\epsilon^{(t)}, \end{aligned} \quad (21)$$

where we use  $\alpha_1 = 1$ . Applying (19) with  $t = 1$  (note  $\alpha_1 = 1$ ), we have

$$f(x_1, \tilde{y}) - f(x_1, y_1) + \frac{\tau}{2} \|v_1 - \tilde{y}\|^2 \leq \frac{\tau}{2} \|y_0 - \tilde{y}\|^2 + \epsilon^{(1)}. \quad (22)$$

Combining with (21),

$$\begin{aligned} & \frac{1}{\alpha_T^2} [f(x_T, \tilde{y}) - f(x_T, y_T)] + \frac{\tau}{2} \|v_T - \tilde{y}\|^2 \\ & \leq \frac{\tau}{2} \|y_0 - \tilde{y}\|^2 + \sum_{t=2}^T \frac{1}{\alpha_{t-1}^2} [f(x_t, \tilde{y}) - f(x_{t-1}, \tilde{y})] + \sum_{t=2}^T \frac{1}{\alpha_{t-1}^2} \epsilon^{(t-1)} + \sum_{t=1}^T \frac{1}{\alpha_t^2} \epsilon^{(t)} \\ & \leq \frac{\tau}{2} \|y_0 - \tilde{y}\|^2 + \frac{1}{\alpha_{T-1}^2} f(x_T, \tilde{y}) - \sum_{t=2}^T \frac{1}{\alpha_{t-1}} f(x_{t-1}, \tilde{y}) + \sum_{t=2}^T \frac{1}{\alpha_{t-1}^2} \epsilon^{(t-1)} + \sum_{t=1}^T \frac{1}{\alpha_t^2} \epsilon^{(t)}, \end{aligned}$$

where in the last inequality we use  $\frac{1}{\alpha_t} - \frac{1}{\alpha_{t-1}} = \frac{1}{\alpha_t}$ . Rearranging,

$$\begin{aligned} & \frac{\tau}{2} \|y_0 - \tilde{y}\|^2 + \sum_{t=2}^T \frac{1}{\alpha_{t-1}^2} \epsilon^{(t-1)} + \sum_{t=1}^T \frac{1}{\alpha_t^2} \epsilon^{(t)} \\ & \geq \frac{1}{\alpha_T^2} [f(x_T, \tilde{y}) - f(x_T, y_T)] + \frac{\tau}{2} \|v_T - \tilde{y}\|^2 - \frac{1}{\alpha_{T-1}^2} f(x_T, \tilde{y}) + \sum_{t=2}^T \frac{1}{\alpha_{t-1}} f(x_{t-1}, \tilde{y}) \\ & \geq \sum_{t=1}^T \frac{1}{\alpha_t} f(x_t, \tilde{y}) - \frac{1}{\alpha_T} f(x_T, y_T) \\ & \geq \sum_{m=1}^T \frac{1}{\alpha_m} f \left( \sum_{t=1}^T \frac{1/\alpha_t}{\sum_{k=1}^T 1/\alpha_k} x_t, \tilde{y} \right) - \frac{1}{\alpha_T} f(x_T, y_T) \\ & \geq \sum_{m=1}^T \frac{1}{\alpha_m} f \left( \sum_{t=1}^T \frac{1/\alpha_t}{\sum_{k=1}^T 1/\alpha_k} x_t, \tilde{y} \right) - \frac{1}{\alpha_T} f(\tilde{x}, y_T) - \frac{1}{\alpha_T} \epsilon^{(T)}, \quad \forall \tilde{x} \in \mathcal{X}, \end{aligned}$$

where in the third inequality we use the convexity of  $f(\cdot, \tilde{y})$ , and in the last inequality we use  $f(x_t, y_t) - \min_{x \in \mathcal{X}} f(x, y_t) \leq \epsilon^{(t)}$ . Note that

$$\sum_{m=1}^t \frac{1}{\alpha_m} = \frac{1}{\alpha_1} + \left( \frac{1}{\alpha_2^2} - \frac{1}{\alpha_1^2} \right) + \left( \frac{1}{\alpha_3^2} - \frac{1}{\alpha_2^2} \right) + \dots + \left( \frac{1}{\alpha_t^2} - \frac{1}{\alpha_{t-1}^2} \right) = \frac{1}{\alpha_t^2}. \quad (23)$$

Therefore

$$f(\bar{x}_T, \tilde{y}) - f(\tilde{x}, y_T) \leq a_T^2 \left[ \frac{\tau}{2} \|y_0 - \tilde{y}\|^2 + 2 \sum_{t=1}^T \frac{1}{\alpha_t^2} \epsilon^{(t)} \right], \quad \forall \tilde{x} \in \mathcal{X}, \tilde{y} \in \mathcal{Y}, \quad (24)$$

which directly implies

$$\text{gap}_f(\bar{x}_T, y_T) \leq \alpha_T^2 \left[ \frac{\tau}{2} \mathcal{D}_Y^2 + 2 \sum_{t=1}^T \frac{1}{\alpha_t^2} \epsilon^{(t)} \right]. \quad (25)$$

By choosing  $\epsilon^{(t)} = \frac{3\tau \mathcal{D}_Y \alpha_t^2}{2\pi t^2}$ ,

$$\sum_{t=1}^T \frac{1}{\alpha_t^2} \epsilon^{(t)} = \frac{3\tau \mathcal{D}_Y}{2\pi} \sum_{t=1}^T \frac{1}{t^2} \leq \frac{\tau \mathcal{D}_Y}{4}, \quad (26)$$

therefore,

$$\text{gap}_f(\bar{x}_T, y_T) \leq \alpha_T^2 \tau \mathcal{D}_Y^2. \quad (27)$$

□

### Proof of Proposition 3.1

*Proof.* First, we show that the initial point  $(x_{t-1}, z_t)$  will not be infinitely far from the saddle point  $(x_t^*, y_t^*)$  of the subproblem  $(\star)$  at  $t$ -th iteration of outer loop. Since  $\mathcal{Y}$  is bounded, we have  $\|z_t - y_t^*\| \leq \mathcal{D}_Y$ . Denote  $x^*(y) = \text{argmin}_x f(x, y)$ . Since  $f(\cdot, y)$  is  $\mu$ -strongly convex, we have

$$\|x^*(y_{t-1}) - x^*(y_t)\| \leq \frac{l}{\mu} \|y_t - y_{t-1}\| \leq \frac{l}{\mu} \mathcal{D}_Y, \quad (28)$$

where we use Lemma B.2 in [25]. Further with the strong convexity of  $f(\cdot, y_{t-1})$ , we have

$$\|x_{t-1} - x_t^*\|^2 \leq 2\|x_{t-1} - x^*(y_{t-1}^*)\|^2 + 2\|x^*(y_{t-1}^*) - x^*(y_t^*)\|^2 \leq \frac{4\epsilon^{(t-1)}}{\mu_x} + 2\left(\frac{\ell}{\mu_x}\right)^2 \mathcal{D}_y.$$

Therefore, the distance from the initial point to the saddle point of the subproblem is bounded. From now, we use subscript to index the iteration of the inner-loop and  $(x_0, y_0)$  denotes the initial point we specified above. We separate the discussion into deterministic and stochastic settings.

**Deterministic setting.** We apply a deterministic algorithm  $\mathcal{M}$  to solve the subproblem and  $\mathcal{M}$  has a linear rate described by (4). By Lemma 2.1, after  $K$  iterations of algorithm  $\mathcal{M}$ ,

$$\begin{aligned} \|x_K - [x_K]_\beta\|^2 + \|y_K - [y_K]_\beta\|^2 &\leq \frac{2}{(1 - \tilde{\ell}/\beta)^3} [\|x_K - x^*\|^2 + \|y_K - y^*\|^2] \\ &\leq \frac{2}{(1 - \tilde{\ell}/\beta)^3} \left(1 - \frac{1}{\Delta_{\mathcal{M}, \tau}}\right)^K [\|x_0 - x^*\|^2 + \|y_0 - y^*\|^2]. \end{aligned}$$

Choosing

$$K = \Delta_{\mathcal{M}, \tau} \log \frac{(1 - \tilde{\ell}/\beta)^3 (\|x_0 - x^*\|^2 + \|y_0 - y^*\|^2)}{2\epsilon},$$

we have  $\|x_K - [x_K]_\beta\|^2 + \|y_K - [y_K]_\beta\|^2 \leq \epsilon$ . To satisfy condition (6), it suffices to set

$$\epsilon = \min \left\{ \frac{\tilde{\mu}^2 \epsilon^{(t)}}{2A(\beta + \tilde{\ell})^2}, \left( \frac{\tilde{\mu} \epsilon^{(t)}}{4\beta \mathcal{D}_y (\beta + \tilde{\ell})} \right)^2 \right\},$$

and we reach our conclusion.

**Stochastic setting.** We apply a stochastic algorithm  $\mathcal{M}$  to solve the subproblem and  $\mathcal{M}$  has a linear rate described by (5). With the same reasoning as in deterministic setting and applying Appendix B.4 of [23], we have

$$K(\epsilon) \leq \Delta_{\mathcal{M}, \tau} \log \frac{(1 - \tilde{\ell}/\beta)^3 (\|x_0 - x^*\|^2 + \|y_0 - y^*\|^2)}{2\Delta_{\mathcal{M}, \tau} \epsilon} + 1,$$

and the conclusion follows directly. □

### Proof of Corollary 3.2

*Proof.* Because  $2/(t+2)^2 \leq \alpha_t^2 \leq 4/(t+1)^2$ , by Theorem 3.1, Algorithm 1 finds  $\epsilon$ -saddle point after  $T = \mathcal{O}(\sqrt{\mu/\epsilon} \cdot \mathcal{D}_y)$  outer-loop iterations. Note that the accuracy we want for solving subproblem  $(\star)$  is

$$\epsilon^{(t)} = \frac{3\tau \mathcal{D}_y \alpha_t^2}{2\pi t^2} \geq \frac{6\tau \mathcal{D}_y}{\pi t^2 (t+2)^2} \geq \frac{6\tau \mathcal{D}_y}{\pi T^2 (T+2)^2} = \Omega(\epsilon^2 \mu^{-1} \mathcal{D}_y^{-3}), \quad \forall t \in [T]. \quad (29)$$

By Proposition 3.1, it takes at most

$$K = \mathcal{O} \left( \Delta_{\mathcal{M}, \tau} \log \left( \frac{\ell \mathcal{D}_y}{\min\{1, \mu, \tau\} \epsilon} \right) \right)$$

gradient oracle calls for  $\mathcal{M}$  to solve the subproblem. The total complexity is then  $K \cdot T$ . □

## C Proofs for Section 4

### Proof of Theorem 4.1

*Proof.* First we define  $\psi$  as the extended-value function of  $g$ :  $\psi(x) = g(x)$  if  $x \in \mathcal{X}$  and  $\psi(x) = \infty$  if  $x \notin \mathcal{X}$ . Note that  $g(x) = \max_{y \in \mathcal{Y}} f(x, y)$  is  $\ell$ -weakly convex [Lemma 3, [47]]. It directly follows from the definition of  $\psi$  that  $\psi$  is also  $\ell$ -weakly convex. Define the proximal point of  $x$  by

$$\text{prox}_{\tau\psi}(x) = \operatorname{argmin}_z \left\{ \psi(z) + \frac{1}{2\tau} \|z - x\|^2 \right\} = \operatorname{argmin}_{z \in \mathcal{X}} g_{1/\tau}(z; x).$$

By [Lemma 4.3 in [11]], as  $\tau_x > \ell$ ,

$$\begin{aligned}
\|\nabla\psi_{1/\tau_x}(x_t)\|^2 &= \tau_x^2 \|x_t - \text{prox}_{\psi/\tau_x}(x_t)\|^2 \leq \frac{2\tau_x^2}{\tau_x - \ell} [g_{\tau_x}(x_t; x_t) - g_{\tau_x}(\text{prox}_{\psi/\tau_x}(x); x_t)] \\
&\leq \frac{2\tau_x^2}{\tau_x - \ell} [g_{\tau_x}(x_t; x_t) - g_{\tau_x}(x_{t+1}; x_t) + \bar{\epsilon}] \\
&= \frac{2\tau_x^2}{\tau_x - \ell} \left\{ g(x_t) - \left[ g(x_{t+1}) + \frac{\tau_x}{2} \|x_{t+1} - x_t\|^2 \right] + \bar{\epsilon} \right\} \\
&\leq \frac{2\tau_x^2}{\tau_x - \ell} [g(x_t) - g(x_{t+1}) + \bar{\epsilon}], \tag{30}
\end{aligned}$$

where in the first inequality we use  $(\tau_x - \ell)$ -strong convexity of  $g_{\tau_x}(\cdot; x_t)$ , and the second inequality follows from  $g_{\tau_x}(x_{t+1}; x_t) \leq \min_{x \in \mathcal{X}} g_{\tau_x}(x; x_t) + \bar{\epsilon}$ . Summing from 0 to  $T - 1$ , we get

$$\frac{1}{T} \sum_{t=0}^{T-1} \|\nabla\psi_{\tau_x}(x_t)\|^2 \leq \frac{2\tau_x^2}{\tau_x - \ell} \left[ \frac{g(x_0) - g(x_T)}{T} + \bar{\epsilon} \right] \leq \frac{2\tau_x^2}{\tau_x - \ell} \left[ \frac{g(x_0) - g^*}{T} + \bar{\epsilon} \right]. \tag{31}$$

□

### Proof of Corollary 4.2

*Proof.* According to Theorem 4.1, with  $\tau_x = 2\ell$ , it takes at most  $T = \frac{4\tau_x^2(g(x_0) - g^*)}{(\tau_x - \ell)\epsilon^2} = \frac{16\ell(g(x_0) - g^*)}{\epsilon^2}$  outer-loops to find  $\epsilon$ -stationary point. The auxiliary problem  $\min_{x \in \mathcal{X}} g_{\tau_x}(x; x_t)$  is then  $\ell$ -SC-C and  $(3\ell)$ -smooth. By Corollary 3.2 and discussion in Section 3.2, Algorithm 1 combined with EG/OGDA/GDA can solve such auxiliary problem with complexity  $\tilde{O}(\sqrt{\ell/\bar{\epsilon}}) = \tilde{O}(\ell/\epsilon)$  as  $\bar{\epsilon} = \frac{\epsilon^2}{8\ell}$  specified in Theorem 4.1. So the total complexity is  $\tilde{O}(\ell^2/\epsilon^3)$ . □

### Proof of Corollary 4.3

*Proof.* As we assume each  $f_i$  has  $\ell$ -Lipschitz gradient,  $f(x, y) = \frac{1}{n} \sum_{i=1}^n f_i(x, y)$  has  $\bar{\ell}$ -Lipschitz gradient. According to Theorem 4.1, with  $\tau_x = 2\bar{\ell}$ , it takes at most  $T = \frac{4\tau_x^2(g(x_0) - g^*)}{(\tau_x - \ell)\epsilon^2} = \frac{16\bar{\ell}(g(x_0) - g^*)}{\epsilon^2}$  outer-loops to find  $\epsilon$ -stationary point. The resulting auxiliary problem is  $\bar{\ell}$ -SC-C and  $(3\bar{\ell})$ -smooth. By Corollary 3.2, Algorithm 1 combined with EG/OGDA can solve such auxiliary problem with complexity

$$\tilde{O} \left( \left( n + \left( \frac{3\bar{\ell} + \tau_y}{\min\{\bar{\ell}, \tau_y\}} \right)^2 \right) \sqrt{\frac{\tau_y}{\bar{\epsilon}}} \right).$$

Choosing  $\tau_y = \bar{\ell}/\sqrt{n}$  and  $\bar{\epsilon} = \frac{\epsilon^2}{8\bar{\ell}}$ , Algorithm 1 has complexity of  $\tilde{O} \left( n^{\frac{3}{4}} \bar{\ell}/\epsilon \right)$  to solve the auxiliary problem. The total complexity is therefore  $\tilde{O} \left( n^{\frac{3}{4}} \bar{\ell}^2 \epsilon^{-3} \right)$ .

When we further assume  $f$  has  $\ell_i$ -cocoercive gradient, Algorithm 1 combined with SVRE can solve such auxiliary problem with complexity

$$\tilde{O} \left( \left( n + \frac{3\bar{\ell} + \tau_y}{\min\{\bar{\ell}, \tau_y\}} \right) \sqrt{\frac{\tau_y}{\bar{\epsilon}}} \right).$$

Choosing  $\tau_y = \bar{\ell}/n$  and  $\bar{\epsilon} = \frac{\epsilon^2}{8\bar{\ell}}$ , Algorithm 1 has complexity of  $\tilde{O} \left( n^{\frac{1}{2}} \bar{\ell}/\epsilon \right)$  to solve the auxiliary problem. The total complexity is therefore  $\tilde{O} \left( n^{\frac{1}{2}} \bar{\ell}^2 \epsilon^{-3} \right)$ . □

## D Additional Experiments

In this section, we provide additional experiments on SC-C minimax problems to illustrate the performance of Catalyst framework. Here we focus on the comparison between the performance of EG, Catalyst-EG and DIAG [47]. We implement these algorithms in the same way as in Section 5.

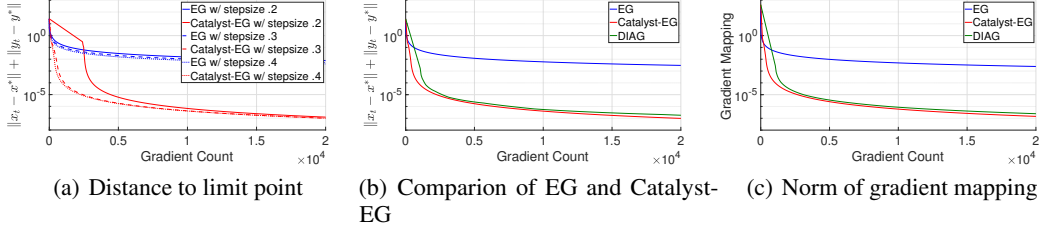

Figure 4: SC-C experiment on distributionally robust logistic regression

### D.1 Distributionally robust logistic regression

We consider the distributionally robust logistic regression problem [32]. This results in a minimax problem:

$$\min_{\theta} \max_{p \in \Delta_n} \sum_{i=1}^n -p_i [y_i \log(\hat{y}(X_i)) + (1 - y_i) \log(1 - \hat{y}(X_i))] \text{ such that } \|p - \mathbf{1}/n\| \leq \rho, \quad (32)$$

where  $\theta$  parametrizes the classifier  $\hat{y}(\cdot)$ , and  $(y, X)$  is classification data. When  $\hat{y}(x) = \frac{e^{\theta^\top x}}{1 + e^{\theta^\top x}}$ , it can be formulated as the following SC-C minimax problem:

$$\min_{\theta} \max_p \sum_{i=1}^n p_i \log(1 + \exp(-y_i \theta^\top X_i)) + \frac{\lambda}{2} \|\theta\|^2 \text{ such that } \|p - \mathbf{1}/n\| \leq \rho, \quad (33)$$

where  $\lambda$  is a regularization parameter.

We conduct experiments on the Wisconsin breast cancer dataset [13], which has 30 attributes and 569 samples. We separate 80% of the data as our training set. We compare the performance of EG, Catalyst-EG and DIAG. We compare EG and Catalyst-EG under same stepsizes in Figure 4(a). We also report two different error measures under the best-tuned stepsizes in Figure 4(b) and 4(c). We observe that Catalyst-EG performs consistently well. As algorithms designed for SC-C setting, both DIAG and Catalyst-EG converge faster than EG.
